# Supplementary material for: Does the influence of substituents impact upon the surface composition of pyrrolidinium-based ionic liquids? An angle resolved XPS study
Source: Royal Society of Chemistry journal article supplement (doi:10.1039/c2cp40262a), 2012-01-01
Supplement: c2cp40262a.pdf [file c2cp40262a.pdf]

# **Does the Influence of Substituents Impact Upon the Surface Composition of Pyrrolidinium-Based Ionic Liquids: An Angle Resolved XPS Study**

Shuang Men, Bitu Birru Hurisso, Kevin R. J. Lovelock ‡\*, Peter Licence\*

*School of Chemistry, University of Nottingham, University Park, Nottingham, NG7 2RD, UK.*

\*To whom correspondence should be addressed. E-mail: [pete.licence@nottingham.ac.uk](mailto:pete.licence@nottingham.ac.uk)

Phone: +44 (0) 115 846 6176. Fax: +44 (0)115 9513563

‡ Current E-mail Address: [k.lovelock@ucl.ac.uk](mailto:k.lovelock@ucl.ac.uk)

XP spectra at  $\theta = 0^\circ, 70^\circ, 80^\circ$  and  $84^\circ$  for pure  $[C_nC_1Pyrr][Tf_2N]$

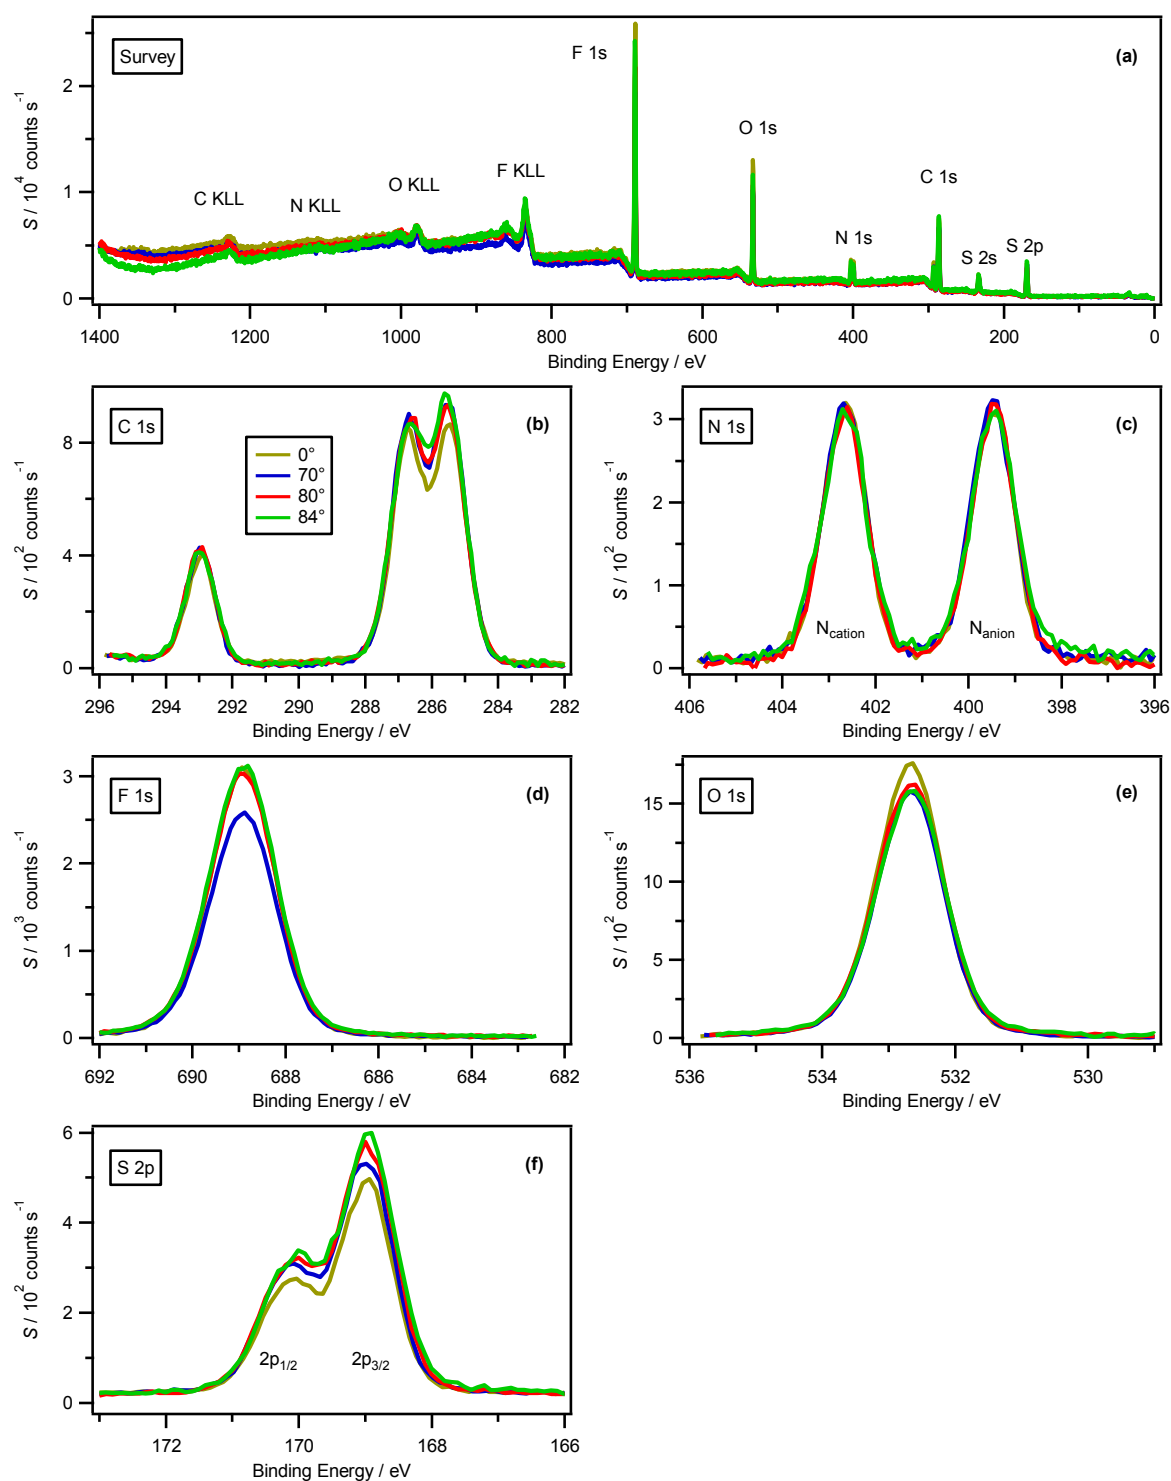

**Figure S1.** XP spectra of  $[C_4C_1Pyrr][Tf_2N]$  for all emission angles for : (a) survey, (b) C 1s, (c) N 1s, (d) F 1s, (e) O 1s and (f) S 2p.

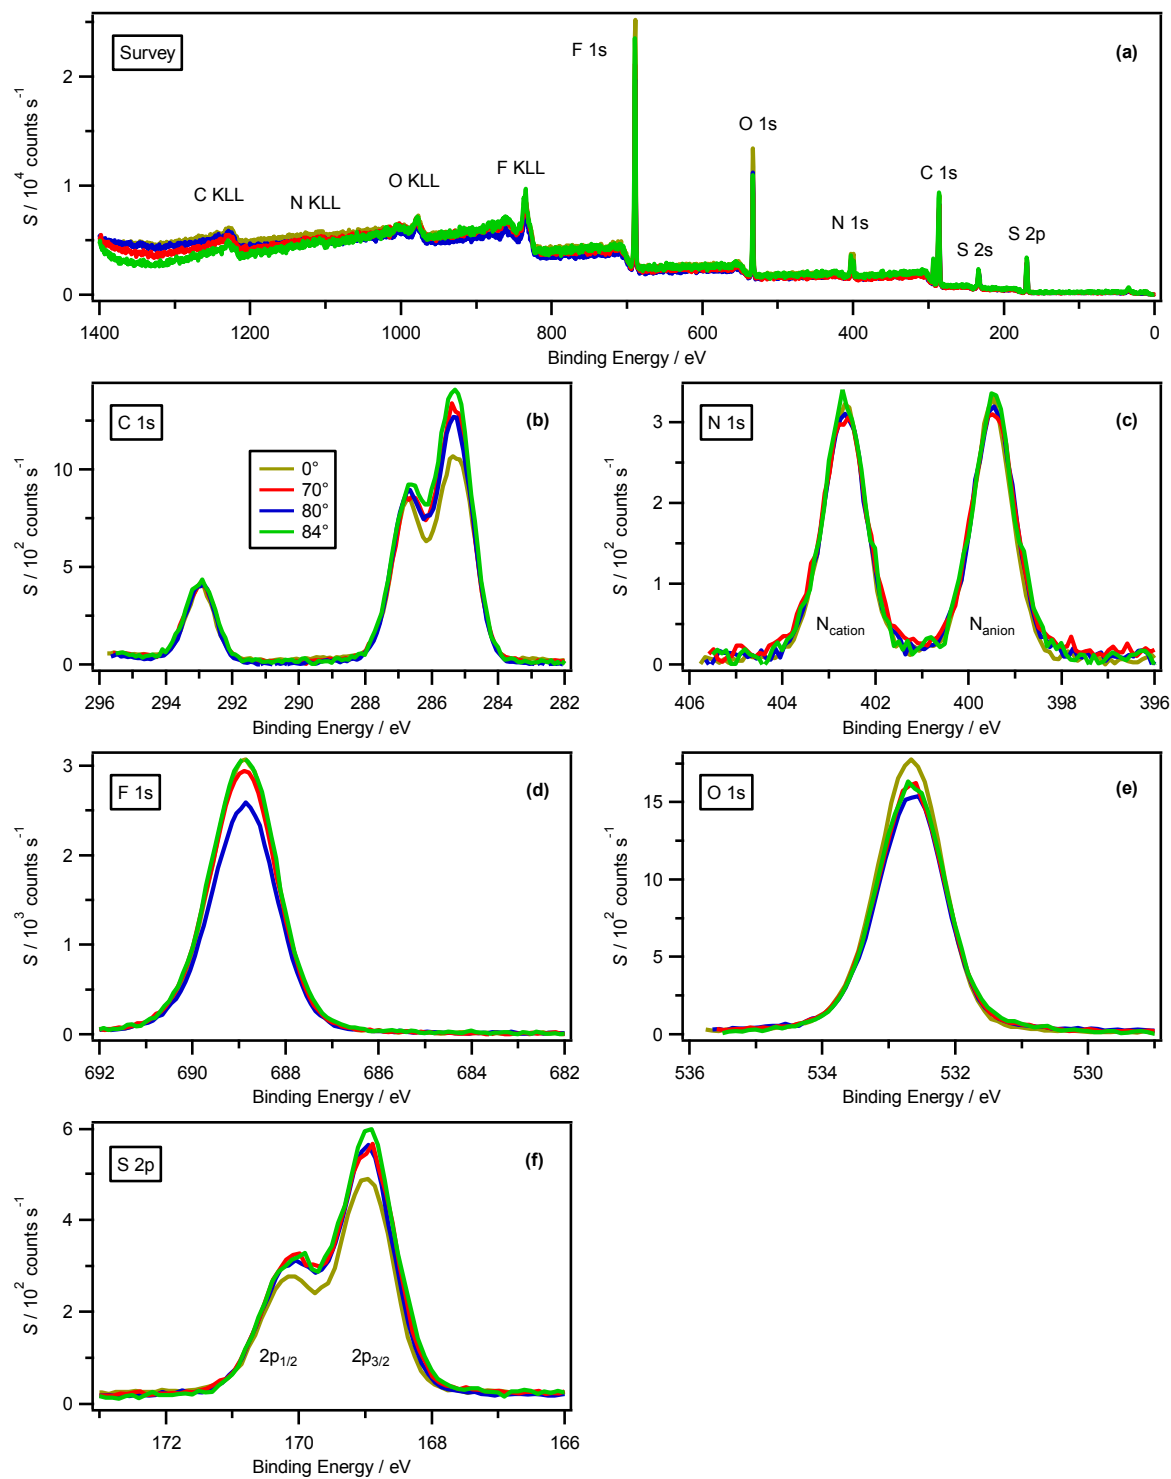

**Figure S2.** XPS spectra of  $[C_6C_1Pyrr][Tf_2N]$  for all emission angles for : (a) survey, (b) C 1s, (c) N 1s, (d) F 1s, (e) O 1s and (f) S 2p.

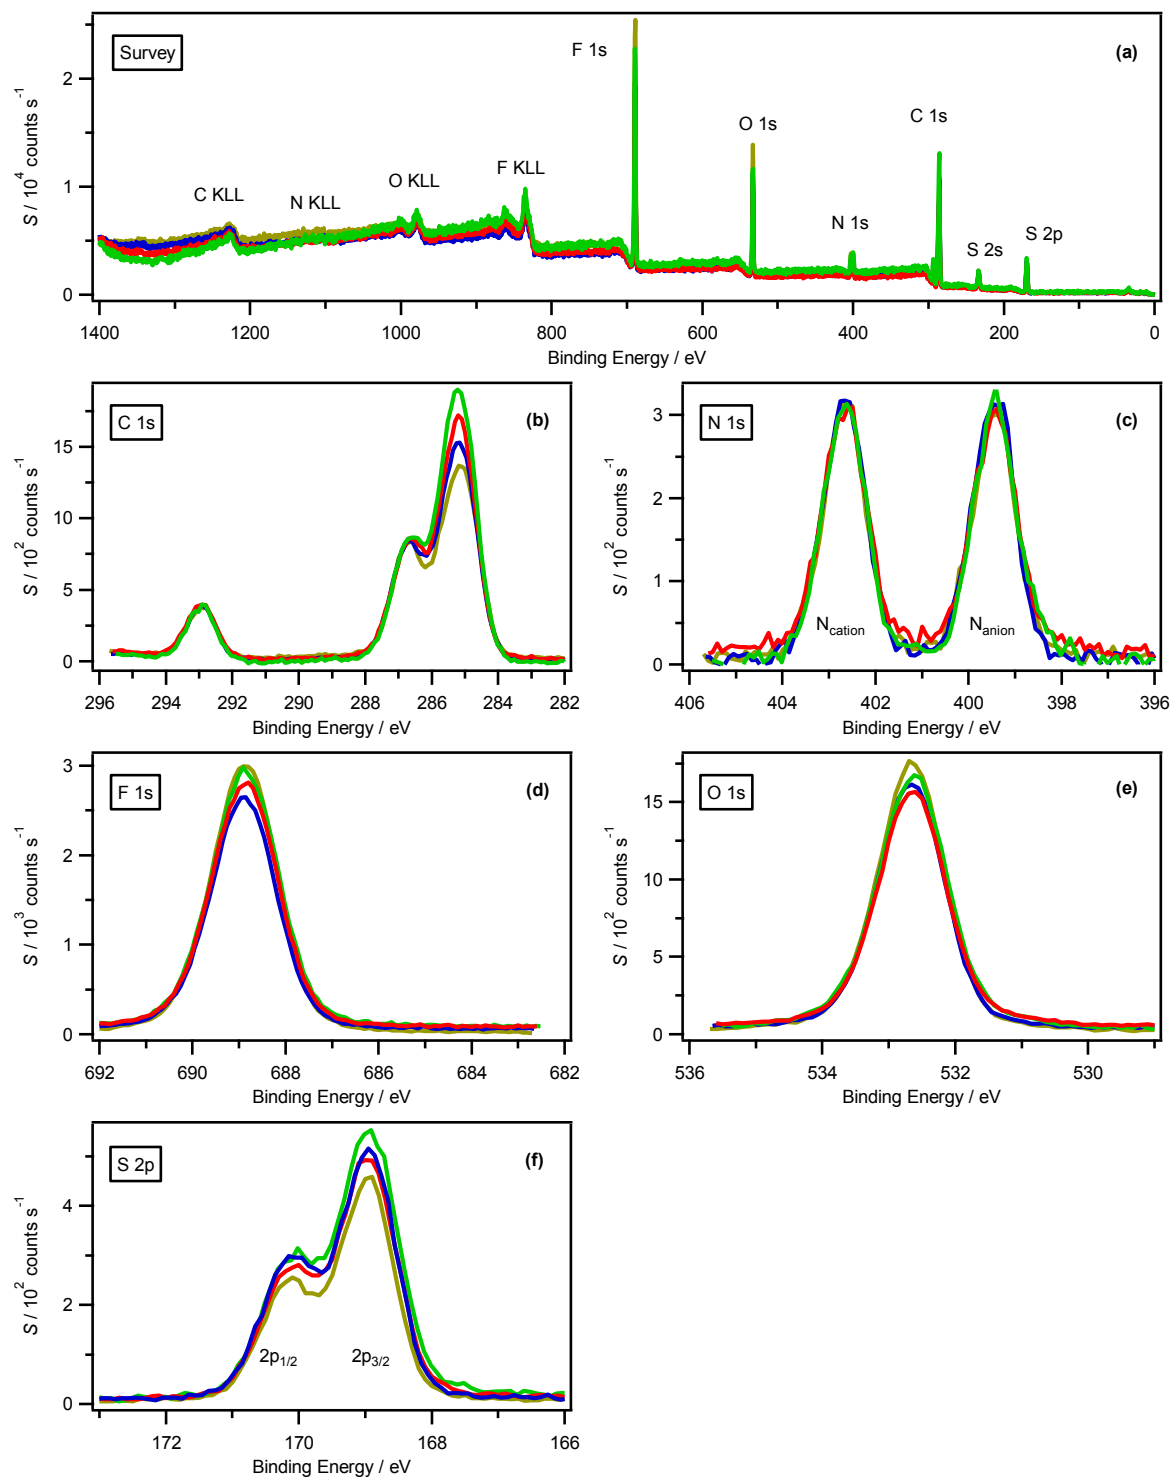

**Figure S3.** XPS spectra of  $[\text{C}_8\text{C}_1\text{Pyrr}][\text{Tf}_2\text{N}]$  for all emission angles for : (a) survey, (b) C 1s, (c) N 1s, (d) F 1s, (e) O 1s and (f) S 2p.

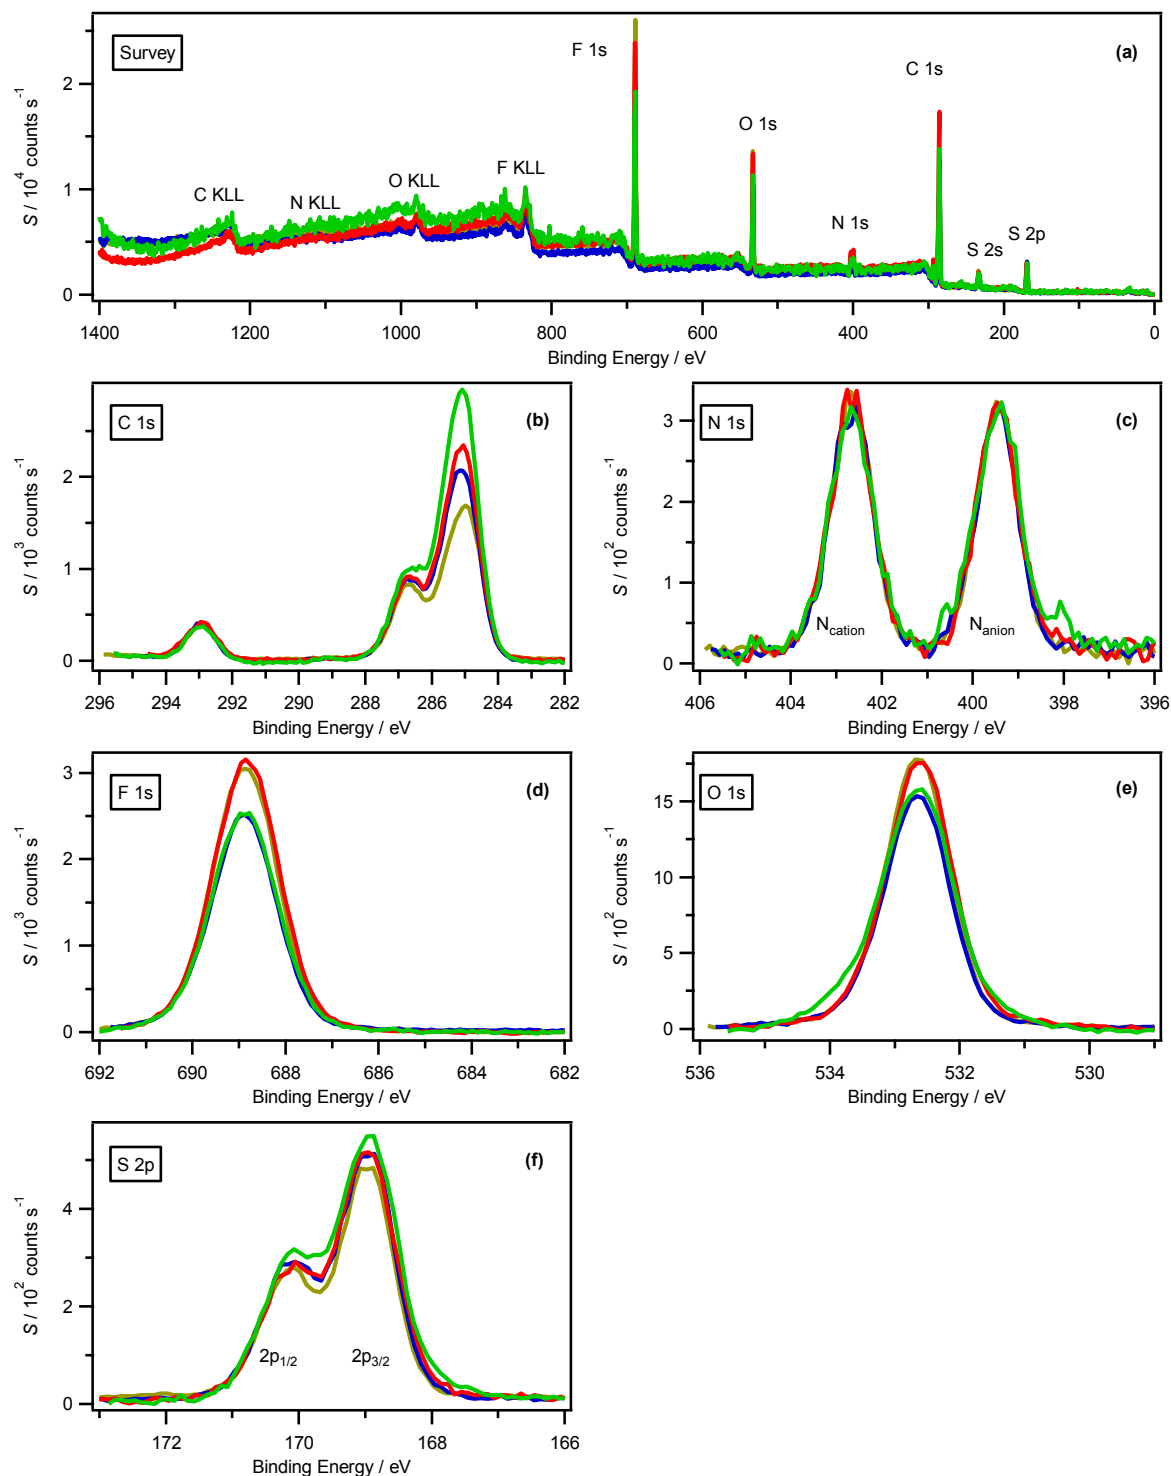

**Figure S4.** XPS spectra of  $[C_{10}C_1Pyrr][Tf_2N]$  for all emission angles for : (a) survey, (b) C 1s, (c) N 1s, (d) F 1s, (e) O 1s and (f) S 2p.
